Now. If you will just institute a "Letters to the Editor" column and publish them as received, including good and bad, you will accomplish several things: 1) increased readership, 2) increased interest in at least one section of our journal, 3) the possibility that ivory tower types (editors included) might learn something from those of us from Nowheresville, and 4) a new beginning in the return of control of our society to grass-roots members,

perhaps similar to the political movement going on in Washington.

Hooray for dirt! And the common man. And the common doctor.

THOMAS R. BUSARD, M.D.  
5050 18th Avenue,  
West Bradenton, Florida 33505

(Accepted for publication June 10, 1981.)

Anesthesiology  
55:609, 1981

### A Simple Device for Remote Monitoring of Respiration

*To the Editor:*—During high voltage radiation treatments at our hospital, no personnel may remain in the room, so patients are monitored by closed-circuit television. We are periodically requested to anesthetize pediatric patients to provide immobility during treatments. However, resolution on the television monitor is limited, and it often is impossible to see the patient's chest move, or even see the movements of the anesthesia bag. We have developed a simple device for magnifying the movement, and therefore the visibility, of the anesthesia bag. A 24-inch (60 cm) stick made of tongue blades taped together is anchored to the bag neck of a Jackson-Rees anesthesia circuit (fig. 1). A small piece of tape may be necessary to hold the stick on top of the bag. During respiration, movement of the free end of the stick, accentuated by a 10-cm flag of white paper, is easily seen on the closed-circuit television screen (fig. 1). Ready availability of components (in every anesthesia cart),

strength, light weight, lack of impedance of free breathing, ease of use and minimal cost has made this device popular in our institution. An engineering degree is not required to assemble, maintain or operate this disposable device, a fact we hope others will find attractive in this era of increasing technological complexity.

REYNOLDS J. SAUNDERS, M.D.  
*Lecturer, Anesthesiology  
Adjunct Professor, Electrical Engineering*

MICHAEL HUMPHREY, M.D.  
*Senior Resident, Anesthesiology  
and Pediatrics*

*Advanced Biotechnology Laboratory  
University of Arizona  
College of Medicine  
Tucson, Arizona 85724*

(Accepted for publication May 22, 1981)

FIG. 1. Accentuation of child's respiratory movements by long lever arm.

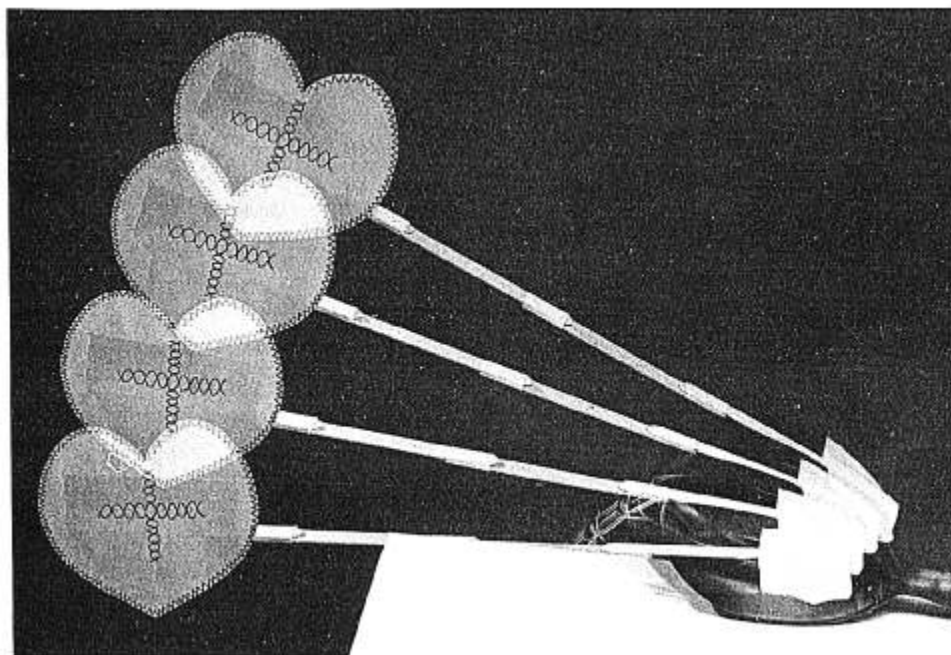

Source: https://asa2.silverchair.com/anesthesiology/article-pdf/55/5/609/303350/0000542-198111000-00036.pdf
